# Supplementary material for: colliertranscription in a singleDrosophilamuscle lineage: the combinatorial control of muscle identity
Source: Oxford University Press journal article supplement (doi:10.1242/dev.008409), 2007-11-15
Supplement: dev008409-sup-008409-figs2.pdf [file dev008409-sup-008409-figs2.pdf]

GTCTGGGGCACCGGGGTAATTTGCATAAGTGTCTTGGCCCCAGGAACCAAAGGACACACTC  
GAGAGCGAGCTGGAAAACTAATTAAAAAATGTTCGCGCCTCAAATTTCCTTTCGCTCGCCCTTA  
TTTATGACCCTGTGAATGTCTTGCATATGGACGGAGTTGAGATCCTTCTCGTTTTCTTCC  
TTTTTTTGTTTACGAGTIGACAAATGGGACATTTACATGCGAGTCAAGTTTGCATATTGGAA  
TTATTCATGGTTTCTTTAAAGATGGCGCAGGATGTGATGTCTCGCGGGAAAAGGATGAGGGT  
TTCCTCAAGGAAPTCGAAAATAGAAAGTGGTTTCTTTTCATGCTACCAATATGGGGGCACA  
TAAAACCTTGCAATTTGATGAGCTAAATGTAAACATACTACTATTTAAATACATTTTTTATGA  
TAAGTGAACCTTAAAGTCACTACTAACTTTTGAAAAATTTGATTGACTTCTACAATGTGTGTT  
GTTTAATTTCTTATTTTATATTTTTTTTAAATATCGAAAAATCTACAAATCCGCTTATGTTT  
AAAAGTCAAGCCGCTGGCTAATTGACAAAATGTGTAATTTGTGGCGATGAGAGTCTTCCG  
ATTGTCACTCTCCCACTCCGTAATCCCTAAGTCAACATAGGGGTTGGGTAAAAATC  
AAATGCGGAAATGTACCAACAAATTTATTTAGCAATTTGGCTAGTGCCTAGTCCGGCGCC  
ATGTAAATCCAATTGTAAACAAATTTGAATCAAATTCGGGGGCATCGCCACCGAAAGGGG  
GTGGCATGGGTTAAAGGGTCAATGGTGTTCATGACAGCTGTCCGCGCCGGGAAACTCCAC  
TGAGGATTGGGCGTGATAAAAAGGGGTTAATCGAACACGCGGACCACAGCTTTTTGGATCGG  
GGAATTTTTCTTACCTTTGCGGAAAAAGAAAAATTTATTTGTCAAAGGGCGTGGAATTTCC  
TTCTGGTTATTTTGGTTAATTAGCGATGCTCTGGGCACTCTTCAGTCTGCTCTTTTCGCC  
TTTGATTTACATAAAAATTTTTGTGCGACCTAGCAGCTCTGGGGAAATGTTTCCAGAACT  
TCTCAAAAATAGACCAACAAGTGTGGGTGTGGGGAAAAATTCGGGAAAAAGAGTTGCCGTC  
TTGTGGTTAACGGAGTTTTTCGGTCTTGTGTCAGAAAGTAAATGAGATTACCACGCCCCCCA  
AATTAATTCACGGAAAAGTCAAACAAGCTCTCTCTCTTTCCCTCGTCCATTCAATCGGTC  
ACAGGCAGAAACCGCAAATGCGGAAAAATGCAAATTTGTTTTTTCATGCGAACCCAGAACCTC  
AAAAACCAATGCCATCCCCTGACCTTTTTTTCACCTTTTGTTCTCCTAACGAGGCGTGAA  
ATTTTGTGGGCGGTTCCGGTAACATAATCCCTTGTGCTGGTGAAGAGAAAGAGGAAGAGGCA  
TTTGATGCGAAGGGTATGCCTATAGGCACTCAACTCTGTTTGACAACCTTCTCTGCCTA  
AATTATGTGCGAAAGTCAAGGGTTAAACCCGAAAATGATGACTAATCAAGTCTGTGCT  
TACAACAAATTTATAAAAACAAAAGCAAGATATAAAGGGAAGAAAGTGAACATGAAACA  
AACAACAGGATTACAACCTGCTTTACGTACATATAACTATAACTTCATATCGCAAAACAT  
TATGAATGTAATTATGTACGTTTCGTTATACATGTAATAGAAAAGCGATACATCATTAAT  
GTATTAATGTGTTATTTTTTATCTAAAAAGTCACAGAAGAATTCATAACTTAAAATTA  
TAAAAATTCTAATTATAATTATAACAATAAAAAATAAATTTTAAATTTGAATGAGGGACCTAT  
GCCTGCAGTTTTCTCCATTTTTACGACTGAATATTTTTTCGACATTCAAATCTGCAGTTCCA  
CTATTTCTCCGCCGTTCCGCGTAGCTATGCGCTGCTTGGTTTTTTGAACTGCTTTGCCGAC  
AGCTAAAGAGAATCGACGCTCTCTCTTGAATTCGCACACCCAACCTGGCCAATCAGGTTTG  
AGCACTGCACACAATGGCATTGCTTTTGGGCTCCCAGAGATTTTGGTTTTTGGTTTTG  
GGTTTTAGTTACCGTTTGGCTTGTGTGTTTTGTTTTTTCGGTGCCCTTGTGTTTGTGCTGCCT  
TGGCTTTGTCTTTGCAGGCGTTGACACTTTGGTTTTCCAAAAGAGCTGAACCGAAGGTGC  
CTGGGAATAGAGAATAAAGCCAAGTGAATGGAGACCCGAGATCCAAAACCGAGATCC  
TAGACACACGCCCCCTCGATTGGGACGTCGTTGCGCTGGTTCCATTTCGCACCCGTTCCCT  
AGGGGGCTGCTCTCACTCGCTCCCCTCGCTCCCATTAGGATGCCATAGGATGGTGGTGG  
GTTCTTTTTTCTGCTGACAGCTTTGCGTCTCTCCACGGGATTGGCCATTGGACTGCCGCC  
AACCCCCACCCCTCCGGCACGCTCTCTCCGCTCTCCCAGTGGCGCAGACTCGTTTTCGTT  
TCCATTTTCGAAACTCTCGTTGGCCTGCCGTTTTTACCCTGCTTCTACTGCTACTGCTTCT  
TTCGCTACGGCCGCTTTGTGGCTCTGCTGCGTCGCTGCCGCTATTGCTGCTGCTGCTGC  
GCCGTCGCCGCCGCTTCTTTTCGACTGCTGCAGCAGCATCGCTTGGCAAGGATTCAGTTG  
GGGTTTAAACAGCCACTCGGGACGTTAGCGCGCCGCTCAAACCTGTTGCGAGACCAATT  
TTCCGAAAATCCCAAATCTCTACGGTGCATTTGGCCAGTTACCCAAAAACACCCACACA  
CACACACACACAGACTGTCTCACTTTTCGTTTCGCGATTGATTGCCAGCTCTCCGGAGACC  
AAGAACCAAAATAATAGAAAAGGGAACCAATACCAATACGACGCCGAAACCGATCGAG  
TTATAAATACAATACGCAAAATAAAAACTAAACAAACAGTAAAACGCCTAGCAAAGAGCC  
TTCAAAACGGCAGCCACAATTTCCAGCGCAGGATTAGGAGGAGACGTAGCCGCGTACGCT  
GATCTCCACCAGCACTCGCATTCGCACCATCCGAATCCGCATCCACATCCGCATCCCCAT  
CCGTTCCGCCACCGACGGCTTCAAGCTGCGTTCCGAAGAGCCGGTGCCTGGGCTTCCAGCTCG  
GCCTCCCCCTGGCCACCCCTGGAGCTGGGATGAGTGGGGCCGGAAGCTGTACCCCACT  
GCCGTTTTCCGGTCCGCGATCCGCCGGCG

**P2.6cl**, -2626

**motif 1**  
**motif 2** Twist  
**motif 3**  
**motif 4**

**P2.3cl**, -2293

**motif 5**  
**motif 6** Nautilus  
**motif 7** Collier

**P1.6cl**, -1627

**motif 8** Mef-2  
**motif 9**  
**motif 10**

**P0.9cl**, -916
