# Supplementary figures and images for: colliertranscription in a singleDrosophilamuscle lineage: the combinatorial control of muscle identity
Source: Oxford University Press journal article supplement (doi:10.1242/dev.008409), 2007-11-15

**A**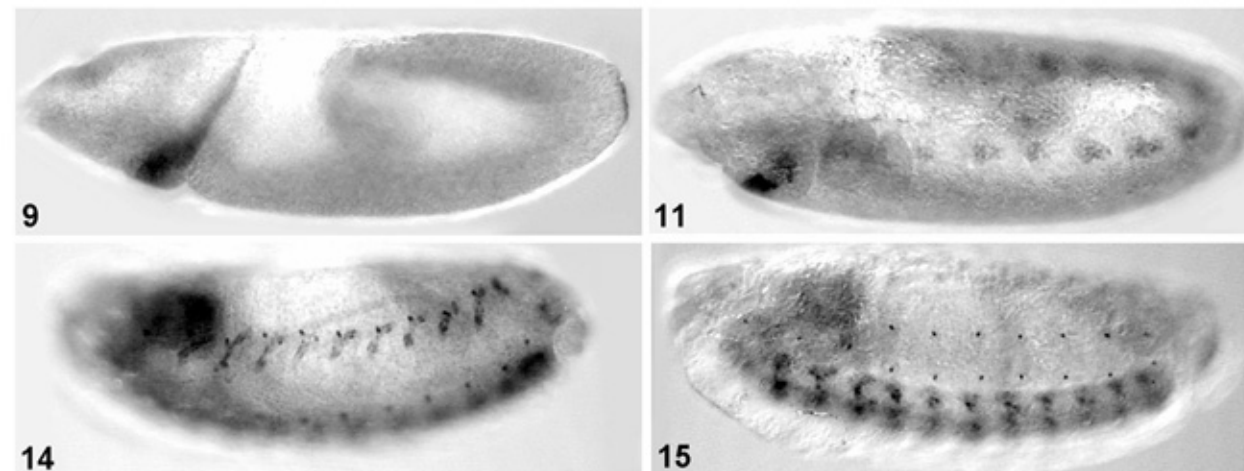**B**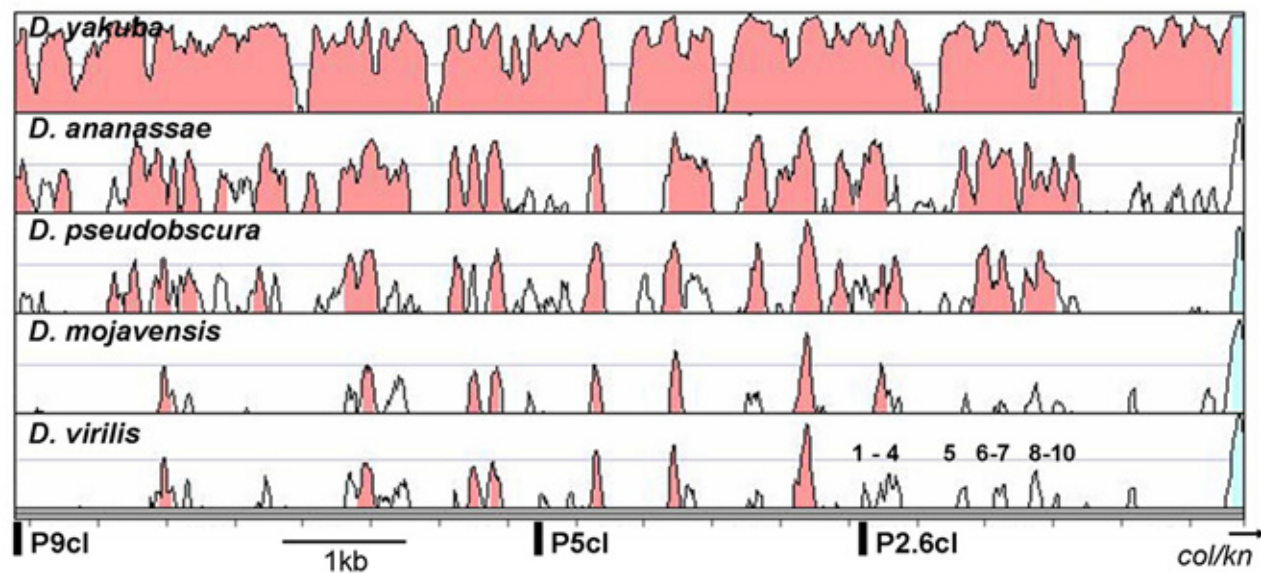

Supplement: dev008409-sup-008409-figs1.pdf [file dev008409-sup-008409-figs1.pdf]
